# Supplementary material
Source: MDPI journal article supplement (https://www.mdpi.com/2073-8994/15/7/1321)
Supplement: s1 [file s1]

Archive with 1 entries (1 files):
- symmetry-2388871-supplementary Materials.pdf
