# Supplementary material
Source: MDPI journal article supplement (https://www.mdpi.com/2073-8994/15/7/1321)
Supplement: s1 [file s1 › symmetry-2388871-supplementary Materials.pdf]

**<Preparatory Positioning>**

(a) Chest Stretch

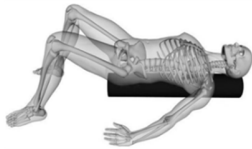

(b) Groin Stretch

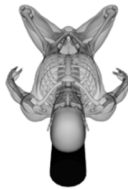

(c) Diagonal Stretch  
← Movement

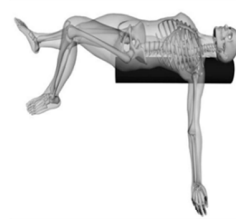

**<Main Motions>**

(1) Scrub Floor

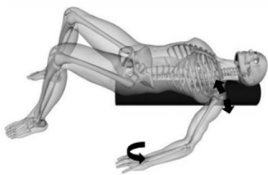

(2) Scapula Exercise

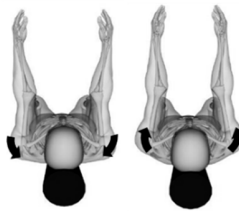

(3) Arm Abduction and Adduction

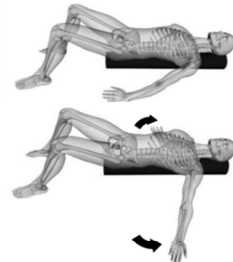

(4) Windshield Wiper

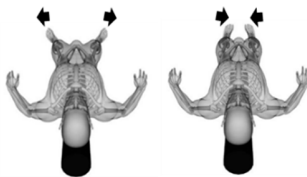

(5) Knee Shake

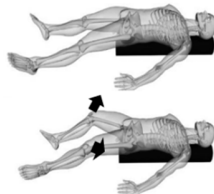

(6) Wiggling

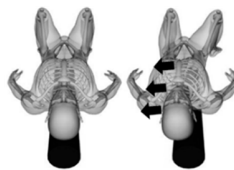

(7) Abdominal Breathing

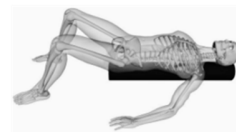

**Figure S1.** Self-mobilization exercise program for Exercise group. The three preparatory positionings do not involve any movement, while the main motions require small magnitude of movement indicated by black arrows.
